# Supplementary material
Source: MDPI journal article supplement (https://www.mdpi.com/2071-1050/10/6/1978)
Supplement: s1 [file s1]

# Public Risk Perception Questionnaire on Thai Railway Projects

Name: \_\_\_\_\_

Hello! I am a postgraduate student of Harbin Engineering University. I would like to extend my sincere gratitude for your precious time to fill this questionnaire. This survey aims to understand the public perception on public risks in railway construction in Thailand. There are no rights or wrong answers. You only need to respond based on your actual situation and understanding. Thank you for your support!

**Gender:** ☐ Male ☐ Female

**Age:** ☐ below 20 years old ☐ 20-30 years old ☐ 30-40 years old ☐ 40-50 years old ☐ 50-60 years old  
☐ more than 60 years old

**Education background:** ☐ junior high school level and below ☐ senior high school / polytechnic school ☐ junior college/graduate ☐ postgraduate and above

**Occupation:** ☐ Party or government agency staff ☐ Institutional staff ☐ Enterprise staff ☐ Professional worker (teachers, doctors, engineers) ☐ Student ☐ Retired staff ☐ Freelancer ☐ Others

## Information Involved

1. What is your understanding on the construction of high-speed railway projects in Thailand?

- ☐ Very poor
- ☐ Poor
- ☐ Normal
- ☐ Good
- ☐ Very Good

2. What do you think about the degree of improving the country's logistics after the completion of the Thai high-speed railway project?

- ☐ Very low
- ☐ Low
- ☐ Normal
- ☐ High
- ☐ Very high

3. What do you think about the degree of improving local people's livelihood and promoting economic and social development after the completion of the high-speed railway project?

- ☐ Very low
- ☐ Low
- ☐ Normal
- ☐ High
- ☐ Very high

4. What is your understanding on the hazards caused by high-speed railway project accidents?

- ☐ Very poor
- ☐ Poor
- ☐ Normal
- ☐ Good
- ☐ Very Good

5. What is your understanding on the reduction of harmful information for high-speed railway projects?

- ☐ I have very poor understanding of the sources of danger related to the railway project and I am not sure if it will cause any harm to human body.
- ☐ I am only aware that it will be dangerous when accidents occur in the railway construction, but I do not understand the protective measures.

- ☐ I know that the railway may be harmful to human health, but it has nothing to do with me.
- ☐ I have a certain understanding on the potential causes of damage to humans health and I know some simple measures to protect them.
- ☐ I have a good understanding of how to reduce risks of injuries and deal with railway accidents.

### **Risk perception**

6. What is your understanding on the safety management information (preventive measures) as well as supervision and management mechanisms in railway construction?

- ☐ I don't know it at all and I have no idea about Thailand's railway construction supervision and management mechanisms.
- ☐ I have little understanding but I only know that there is a certain degree of protection.
- ☐ I have a certain understanding and I know that there will be a security policy. But I don't care about the specific safeguards.
- ☐ I have a slight understanding and I know the corresponding supervision and management policies from government for the safety management of the railway construction.
- ☐ I clearly understand it and I pay attention to and mastered the safety management system of railways construction and the response measures from related department after the accident.

7. What is your understanding on the high-speed railways construction site selection and project construction information?

- ☐ I don't know it at all and the site of railway project has nothing to do with me.
- ☐ I have little understanding. As long as they are not established in my city, I do not care about the construction of railway projects.
- ☐ I have a slight understanding and I know there will be scientific basis for the location of the railway projects.
- ☐ I have a certain understanding of the development strategy of Thailand's high-speed railway projects.
- ☐ I know the strategy for the construction of high-speed railways in Thailand very well. I always pay attention to it, actively participate and express my opinions.

8. Do you think that the high-speed rail construction projects will cause any environmental pollution and bring about high risks to the residents who live around the railway? (Visibility)

- ☐ Totally Impossible ☐ slightly impossible ☐ Neutral ☐ slightly possible ☐ totally possible

9. Do you think that; the probability of a high-speed rail accident is high? (Possibility)

- ☐ Very possible ☐ possible ☐ Neutral ☐ impossible ☐ totally impossible

10. Do you agree that accidents caused by high-speed railway construction projects will result in serious casualties and economic losses, or even affect future generations? (Severity)

- ☐ Very possible ☐ possible ☐ Neutral ☐ impossible ☐ totally impossible

### **Social mood**

11. Are you interested in the development of high-speed railway projects in Thailand?

- ☐ Not interested at all ☐ slightly interested ☐ Neutral ☐ Interested ☐ Very interested

12. Are you extremely worried about the construction of railway projects in your city?

- ☐ extremely worried ☐ slightly worried ☐ Neutral ☐ not worried ☐ not worried at all

13. Are you nervous or anxious because of the railway construction in your city?

- ☐ Extremely nervous ☐ slightly nervous ☐ Neutral ☐ not nervous ☐ not nervous at all

14. Are you dissatisfied or annoyed with the development of railways in your city?

- ☐ extremely annoyed ☐ slightly annoyed ☐ Neutral ☐ not annoyed ☐ Very annoyed

15. Do you think it is difficult to control accidents and losses that occur in railway construction? (Controllability)

- ☐ Very difficult ☐ little difficult ☐ Neutral ☐ Not difficult ☐ Not difficult at all

16. Do you feel worried that damage caused by railway construction accidents will happen to you or your family? (Horror)

☐ Very much worried ☐ little worried ☐ Neutral ☐ Not worried ☐ Not worried at all

### **Technical risk**

17. Do you trust the technical capabilities of overseas railways to ensure safety in the surrounding environment?

☐ Absolutely distrust ☐ slightly distrust ☐ Neutral ☐ little trust ☐ Absolutely trust

18. Do you trust overseas railroads in controlling railway risk?

☐ Absolutely distrust ☐ Little distrust ☐ Neutral ☐ Little trust ☐ Absolutely trust

19. Do you trust the systematic technical capabilities of the overseas railway system?

☐ Absolutely distrust ☐ Little distrust ☐ Neutral ☐ Little trust ☐ Absolutely trust

20. Do you trust risk management capabilities of overseas railway technology?

☐ Absolutely distrust ☐ Little distrust ☐ Neutral ☐ Little trust ☐ Absolutely trust

### **Trust rank:**

21. Do you trust that experts and scholars have the ability to make correct evaluation of railway projects?

☐ Absolutely distrust ☐ Little distrust ☐ Neutral ☐ Little trust ☐ Absolutely trust

22. Do you trust what the relevant experts and scholars have expressed on high-speed railway?

☐ Absolutely distrust ☐ Little distrust ☐ Neutral ☐ Little trust ☐ Absolutely trust

23. Do you trust in the responsibility of relevant experts and scholars?

☐ Absolutely distrust ☐ Little distrust ☐ Neutral ☐ Little trust ☐ Absolutely trust

24. Do you trust the authenticity of relevant experts and scholars?

☐ Absolutely distrust ☐ Little distrust ☐ Neutral ☐ Little trust ☐ Absolutely trust

25. Do you trust the news media report on the high-speed rail project?

☐ Absolutely distrust ☐ Little distrust ☐ Neutral ☐ Little trust ☐ Absolutely trust

26. Do you trust that news media reports on high-speed rail projects will be timely?

☐ Absolutely distrust ☐ Little distrust ☐ Neutral ☐ Little trust ☐ Absolutely trust

27. Do you trust that news media reports on railway projects will be accurate?

☐ Absolutely distrust ☐ Little distrust ☐ Neutral ☐ Little trust ☐ Absolutely trust

28. Do you trust the decision of the government for railway projects, including high-speed rail construction planning and site selection?

☐ Absolutely distrust ☐ Little distrust ☐ Neutral ☐ Little trust ☐ Absolutely trust

29. Do you trust the bidding and supervision system of government for railway projects?

☐ Absolutely distrust ☐ Little distrust ☐ Neutral ☐ Little trust ☐ Absolutely trust

30. Do you trust the government's rationality in the decision-making process of railway projects? Whether it integrates multiple perspectives? How about the degree of democracy?

☐ Absolutely distrust ☐ Little distrust ☐ Neutral ☐ Little trust ☐ Absolutely trust

31. Do you trust the government's ability to manage emergency accidents in railway projects, such as the disclosure of crisis information, job placement and settlement, etc.?

☐ Absolutely distrust ☐ Little distrust ☐ Neutral ☐ Little trust ☐ Absolutely trust

32 What do you think on the level of public bidding for the Thai Rail Corporation railway project?

☐ Very small

☐ Small

☐ Normal

☐ Large

☐ Very large

33. What do you think on the level of the management system of Thai Railway's railway projects?

- ☐ Very small
- ☐ Small
- ☐ Normal
- ☐ Large
- ☐ Very large

34. What do you think on the level of risk prevention and control of Thai Railway's railway projects?

- ☐ Very small
- ☐ Small
- ☐ Normal
- ☐ Large
- ☐ Very large
